# Supplementary material for: Quantum-Cosmos Nexus Theory
Source: Preprints.org preprint supplement (doi:10.20944/preprints202310.1554.v2), 2023-10-26
Supplement: Supplementary file 1 [file supplementary]

## Sheet: Sheet1
z	Age in Gyr	Age in seconds	Radius of the universe (m)	Hubble accelarationt (m/s^2)	G (m^3/kg*s^2)
0	13.721	4.3300183\times10^{17}	1.29810683\times10^{26}	6.92358409\times10^{-10}	6.73866e-11
0.1	12.411	3.91661374\times10^{17}	1.17417126\times10^{26}	7.65437896\times10^{-10}	8.23629e-11
0.2	11.27	3.55654152\times10^{17}	1.06622432\times10^{26}	8.42932541\times10^{-10}	9.98843e-11
0.3	10.273	3.24191225\times10^{17}	9.71900842\times10^{25}	9.24739582\times10^{-10}	1.20213e-10
0.4	9.398	2.96578325\times10^{17}	8.8911945\times10^{25}	1.01083738\times10^{-9}	1.4364e-10
0.5	8.628	2.72278973\times10^{17}	8.16271826\times10^{25}	1.10104888\times10^{-9}	1.70422e-10
0.6	7.948	2.50819805\times10^{17}	7.51938859\times10^{25}	1.19525034\times10^{-9}	2.0083e-10
0.7	7.345	2.31790572\times10^{17}	6.94890653\times10^{25}	1.29337641\times10^{-9}	2.35159e-10
0.8	6.81	2.14907256\times10^{17}	6.44275745\times10^{25}	1.39498528\times10^{-9}	2.73559e-10
0.9	6.331	1.99791166\times10^{17}	5.98958847\times10^{25}	1.5005291\times10^{-9}	3.1652e-10
1	5.903	1.86284513\times10^{17}	5.5846692\times10^{25}	1.60932572\times10^{-9}	3.64082e-10
1.1	5.519	1.74166394\times10^{17}	5.22137714\times10^{25}	1.7212991\times10^{-9}	4.16509e-10
1.2	5.172	1.63215907\times10^{17}	4.89308979\times10^{25}	1.83678456\times10^{-9}	4.74273e-10
1.3	4.859	1.53338378\times10^{17}	1.53338378\times10^{17}	1.95510388\times10^{-9}	5.37343e-10
1.4	4.574	1.44344462\times10^{17}	4.32733811\times10^{25}	2.07692387\times10^{-9}	6.06391e-10
1.5	4.316	1.36202602\times10^{17}	4.08325128\times10^{25}	2.20107732\times10^{-9}	6.81055e-10
1.6	4.08	1.28755008\times10^{17}	3.85997803\times10^{25}	2.32839454\times10^{-9}	7.62123e-10
1.7	3.864	1.21938566\times10^{17}	3.65562624\times10^{25}	2.45855325\times10^{-9}	8.49711e-10
1.8	3.666	1.15690162\times10^{17}	3.4683038\times10^{25}	2.59133925\times10^{-9}	9.43975e-10
1.9	3.484	1.09946678\times10^{17}	3.29611848\times10^{25}	2.72670774\times10^{-9}	1.04517e-09
2	3.316	1.04645002\times10^{17}	3.13717824\times10^{25}	2.86485214\times10^{-9}	1.15376e-09
3	2.171	6.85115496\times10^{16}	2.05392459\times10^{25}	4.37579444\times10^{-9}	2.69169e-09
4	1.558	4.91667408\times10^{16}	1.47398181\times10^{25}	6.09746453\times10^{-9}	5.22649e-09
5	1.186	3.74273136\times10^{16}	1.12204263\times10^{25}	8.00999134\times10^{-9}	9.01936e-09
6	0.942	2.97272592\times10^{16}	8.91200811\times10^{24}	1.00847662\times10^{-8}	1.4297e-08
7	0.771	2.43309096\times10^{16}	7.29422319\times10^{24}	1.23214653\times10^{-8}	2.13421e-08
8	0.646	2.03862096\times10^{16}	6.11163189\times10^{24}	1.47056497\times10^{-8}	3.04005e-08
9	0.551	1.73882376\times10^{16}	5.21286249\times10^{24}	1.72411066\times10^{-8}	4.17871e-08
10	0.478	1.50845328\times10^{16}	4.52222917\times10^{24}	1.98741626\times10^{-8}	5.55251e-08
11	0.419	1.32226344\times10^{16}	3.96404607\times10^{24}	2.26726724\times10^{-8}	7.22632e-08
12	0.372	1.17394272\times10^{16}	3.51939174\times10^{24}	2.55372305\times10^{-8}	9.16768e-08
13	0.332	1.04771232\times10^{16}	3.14096252\times10^{24}	2.86140052\times10^{-8}	1.15098e-07
14	0.3	9.46728\times10^{15}	2.83821914\times10^{24}	3.16661658\times10^{-8}	1.40962e-07
15	0.272	8.5836672\times10^{15}	2.57331869\times10^{24}	3.49259181\times10^{-8}	1.71478e-07
16	0.248	7.8262848\times10^{15}	2.34626116\times10^{24}	3.83058457\times10^{-8}	2.06273e-07
17	0.228	7.1951328\times10^{15}	2.15704655\times10^{24}	4.16660076\times10^{-8}	2.44048e-07
18	0.21	6.627096\times10^{15}	1.9867534\times10^{24}	4.52373797\times10^{-8}	2.87678e-07
19	0.194	6.1221744\times10^{15}	1.83538171\times10^{24}	4.89682976\times10^{-8}	3.37087e-07
20	0.18	5.680368\times10^{15}	1.70293149\times10^{24}	5.2776943\times10^{-8}	3.91562e-07
21	0.168	5.3016768\times10^{15}	1.58940272\times10^{24}	5.65467246\times10^{-8}	4.49497e-07
22	0.157	4.9545432\times10^{15}	1.48533468\times10^{24}	6.0508597\times10^{-8}	5.1469e-07
23	0.148	4.6705248\times10^{15}	1.40018811\times10^{24}	6.41881739\times10^{-8}	5.79191e-07
24	0.139	4.3865064\times10^{15}	1.31504154\times10^{24}	6.83442427\times10^{-8}	6.56622e-07
25	0.131	4.1340456\times10^{15}	1.23935569\times10^{24}	7.25179369\times10^{-8}	7.39269e-07
26	0.123	3.8815848\times10^{15}	1.16366985\times10^{24}	7.72345507\times10^{-8}	8.38562e-07
27	0.117	3.6922392\times10^{15}	1.10690547\times10^{24}	8.11952969\times10^{-8}	9.26773e-07
28	0.111	3.5028936\times10^{15}	1.05014108\times10^{24}	8.55842318\times10^{-8}	1.02967e-06
29	0.105	3.313548\times10^{15}	9.933767\times10^{23}	9.04747594\times10^{-8}	1.15071e-06
30	0.1	3.15576\times10^{15}	9.46073047\times10^{23}	9.49984974\times10^{-8}	1.26866e-06
